1 **Ecosphere**

2 Article

3

4 Pawpaws prevent predictability: A locally-dominant tree alters understory beta-diversity and  
5 community assembly

6

7 Anna C. Wassel<sup>1</sup> and Jonathan A. Myers<sup>1</sup>

8 <sup>1</sup>Department of Biology, Washington University in St. Louis, St. Louis, Missouri, 63130, USA

9 Corresponding author: Anna C Wassel [anna.cr.wassel@gmail.com](mailto:anna.cr.wassel@gmail.com)

10

11 Open research statement: The data underlying this article will be made freely available and  
12 permanently archived in Dryad or Zenodo if accepted for publication. Code used for this study is  
13 not novel: R packages used are cited in the body of the paper and code for the null model is  
14 provided in previous papers Kraft et al. 2011; LaManna et al. 2021).

15

16 Key words: *Asimina triloba*; beta-diversity; community assembly; community size; competition;  
17 dominant species; ecological drift; forest herbs; null model; species interactions; stochasticity;  
18 temperate forest

19 **Abstract –**

20 While dominant species are known to be important in ecosystem functioning and community  
21 assembly, biodiversity responses to the presence of dominant species can be highly variable.  
22 Dominant species can increase the importance of deterministic community assembly by  
23 competitively excluding species in a consistent way across local communities, resulting in low  
24 site-to-site variation in community composition (beta-diversity) and non-random community  
25 structure. In contrast, dominant species could increase the importance of stochastic community  
26 assembly by reducing the total number of individuals in local communities (community size),  
27 resulting in high beta-diversity and more random community structure. We tested these  
28 hypotheses in a large, temperate oak-hickory forest plot containing a locally-dominant tree  
29 species, pawpaw (*Asimina triloba*; Annonaceae), an understory tree species that occurs in dense,  
30 clonal patches in forests throughout the east-central United States. We determined how the  
31 presence of pawpaw influences local species diversity, community size, and beta-diversity by  
32 measuring the abundance of all vascular plant species in 1x1-m plots both inside and outside  
33 pawpaw patches. To test whether the presence of pawpaw influences local assembly processes,  
34 we compared observed patterns of beta-diversity inside and outside patches to a null model of  
35 random assembly. We found lower local species diversity, lower community size, and higher  
36 observed beta-diversity inside pawpaw patches than outside pawpaw patches. Moreover,  
37 standardized effect sizes of beta-diversity from the null model were lower inside pawpaw  
38 patches than outside pawpaw patches, indicating more random community composition inside  
39 pawpaw patches. Together these results suggest that pawpaw increases the importance of  
40 stochastic relative to deterministic community assembly at local scales, likely by decreasing  
41 overall numbers of individuals, and increasing random local extinctions inside patches. Our

- 42 findings provide insights into the ecological processes by which locally-dominant tree species
- 43 shape the assembly and diversity of understory plant communities at different spatial scales.

## 44 **Introduction**

45           Highly abundant species within communities can have strong effects on biodiversity and  
46 ecosystem functioning (Grime 1998, Gaston 2011, Avolio et al. 2019). Species that have high  
47 abundance relative to other species in a community *and* proportionate effects on environmental  
48 conditions, community diversity, and/or ecosystem functioning are considered “dominant  
49 species” (Avolio et al. 2019). Dominant species can determine nutrient cycling and primary  
50 productivity (Grime 1998, Ellison 2019), increase resistance or resilience of ecosystems to  
51 environmental change (Avolio et al. 2019), add physical structure to a habitat (Dayton 1972,  
52 Altieri and Witman 2014), and modify the abiotic environment in ways that create more harsh  
53 conditions or conversely ameliorate abiotic stress for other species (Hughes 2010, Lustenhouwer  
54 et al. 2012, Gavilán and Callaway 2017). Although the loss of dominant species can have  
55 cascading effects on communities and ecosystems, their effects on patterns of species diversity  
56 can be highly variable (Myers and Harms 2009, Hughes 2010, Gavilán and Callaway 2017,  
57 Avolio et al. 2019, Ellison et al. 2019, Elsberry and Bracken 2021). This variation potentially  
58 reflects multiple ecological processes through which dominant species affect community  
59 assembly, but the relative roles of these processes remain understudied.

60           Dominant species can affect community assembly through deterministic or stochastic  
61 processes. Deterministic processes include abiotic filtering and biotic interactions such as  
62 competition and facilitation that reflect niche differences among species in a community  
63 (Vellend 2010, Chase and Myers 2011, Leibold and Chase 2017). Dominant species can increase  
64 the importance of interspecific competition when they limit space or resources for other species  
65 (e.g. Lustenhouwer et al. 2012), resulting in competitive exclusion (Konno 2002, Segre et al.  
66 2014, Ellison et al. 2015). Alternatively, dominant species can facilitate the survival of certain

67 species by lowering abiotic stress (e.g. Gavlán and Callaway 2017). Dominant species can also  
68 increase the importance of stochastic community assembly by decreasing the total number of  
69 individuals in a local community (local community size) (Powell et al. 2013). As local  
70 community size decreases, more species in the community may become rare, thereby increasing  
71 demographic stochasticity and random changes in species' relative abundances (ecological drift;  
72 MacArthur and Wilson 1967, Hubbell 2001, Orrock and Watling 2010). In addition, amelioration  
73 of stressful conditions by dominant species can lead to more random assembly of nondominant  
74 species (Arnillas and Cadotte 2019). The effects of dominant species on deterministic and  
75 stochastic processes are expected to increase when dominant species are also of large stature, i.e.,  
76 when size asymmetries among competing species or guilds are large (Keddy and Shipley 1989,  
77 Myers and Harms 2009).

78         Despite widespread interest in the role of dominant species in communities and  
79 ecosystems (Ellison et al. 2005, Gilbert et al. 2009, Avolio et al. 2019), their relative effects on  
80 deterministic and stochastic community assembly remain unresolved. First, previous studies have  
81 largely focused on how dominant species influence species diversity at local spatial scales (e.g.,  
82 alpha diversity), but similar patterns of local species diversity could reflect different assembly  
83 processes. For example, low species richness can result from either competitive exclusion by  
84 dominant species (Konno 2002, Segre et al. 2014, Ellison et al. 2015) or random local  
85 extinctions in small communities with few individuals (Powell et al. 2013). Most dominant-  
86 species removal experiments in plant communities have focused on changes in local species  
87 richness or diversity, finding a mix of positive (Konno 2002, Segre et al. 2014, Ellison et al.  
88 2015, Avolio et al. 2019), negative (Hughes 2010, Altieri and Witman 2014, Gavlán and  
89 Callaway 2017), or no clear response (Myers and Harms 2009, Gilbert et al. 2009) to the

90 removal of dominant plant species. Second, relatively few studies have examined how dominant  
91 species influence site-to-site variation in community composition (beta-diversity). Patterns  
92 of beta-diversity can help elucidate the relative importance of deterministic and stochastic  
93 processes (Anderson et al. 2011, Chase and Myers 2011). For example, deterministic exclusion  
94 of inferior competitors by dominant species should cause local communities to converge in  
95 composition (i.e., low beta-diversity), whereas random local extinctions in small communities  
96 should cause local communities to diverge in composition (i.e., high beta-diversity). Finally,  
97 observed changes in beta-diversity can be compared to a null model of random community  
98 assembly to further assess the relative roles of deterministic and stochastic processes (Chase  
99 2007, Catano et al. 2017). Therefore, patterns of diversity at different scales can provide key  
100 insights into the ecological roles of dominant species in community assembly and ecosystem  
101 functioning.

102         In this study, we examined the effect of a locally-dominant tree species, pawpaw  
103 (*Asimina triloba*; Annonaceae), on the diversity and assembly of understory plant communities  
104 in a temperate forest-dynamics plot. Our focal species, pawpaw, is a widely-distributed  
105 understory tree species that occurs in dense, clonal patches in forests throughout the east-central  
106 United States. Pawpaw has been shown to be a dominant species in temperate forests with high  
107 local abundance (Appendix S1: Fig. S1) and strong effects on the diversity of other tree species  
108 (Baumer and Runkle 2010). While the assembly of forest tree communities is fairly well studied  
109 (e.g. Condit et al. 2000, Condit et al. 2002, Ellison et al. 2019), the assembly of forest herb  
110 communities has received less attention, despite the disproportionate contribution of herbaceous  
111 plant species to temperate forest diversity (Gilliam 2007, Spicer et al. 2020). We therefore

112 examined the effect of pawpaw on both the total understory community (woody and herbaceous  
113 species combined) and herbaceous species only.

114 We tested two non-mutually exclusive hypotheses. First, we tested the hypothesis that  
115 pawpaw increases the relative role of deterministic assembly through interspecific competition  
116 (hereafter the deterministic assembly hypothesis). Second, we tested the hypothesis that pawpaw  
117 increases the relative role of stochastic assembly by decreasing local community size (hereafter  
118 the stochastic assembly hypothesis). The deterministic assembly hypothesis predicts that the  
119 presence of dominant species 1) decreases local species diversity due to competitive exclusion,  
120 2) decreases beta-diversity among local communities by selecting for a limited subset of species  
121 that can co-occur with dominant species, and 3) results in lower beta-diversity than expected by  
122 random assembly from the species pool. In contrast, the stochastic assembly hypothesis predicts  
123 that the presence of dominant species 1) decreases local species diversity, but 2) increases beta-  
124 diversity among local communities, due to random local extinctions, and 3) results in beta-  
125 diversity that is more similar to patterns expected under random assembly from the species pool.  
126 We tested these predictions by comparing observed patterns of local species diversity, local  
127 community size, and beta-diversity among paired groups of understory plant communities  
128 located inside and outside of pawpaw patches. We then compared observed patterns of beta-  
129 diversity to a null model that simulated random assembly of local communities from the species  
130 pool.

## 131 **Methods**

### 132 *Study site and focal species*

133 We conducted this study at Washington University in St. Louis' environmental field  
134 station, Tyson Research Center, located 25 miles from St. Louis, Missouri. The 800-ha site is

135 located on the edge of the Ozark highlands, dominated by late-successional, deciduous oak-  
136 hickory forest, and contains a topographically heterogeneous landscape characterized by silty  
137 loam and silty clay soils that develop from shale and cherty limestone (Zimmerman and Wagner  
138 1979). Our study was conducted within the Tyson Research Center Forest Dynamics Plot, a large  
139 (20.16 ha; 480 x 420 m), stem-mapped forest plot that is part of the Forest Global Earth  
140 Observatory (ForestGEO) network (Anderson-Teixeira et al. 2015). The 20-ha plot includes  
141 more than 1,600 stems of pawpaw at least 1 cm in diameter at breast height (DBH), most of  
142 which occur in 18 patches ranging in area from 5-1028 m<sup>2</sup>.

143 Our focal dominant species for this study is the pawpaw tree, *Asimina triloba*  
144 (Annonaceae) (hereafter pawpaw). Pawpaw is distributed widely throughout the east-central  
145 United States and parts of southern Canada (Sullivan 1993), making it the northernmost member  
146 of the otherwise tropical family Annonaceae. It primarily occurs in moist valleys and mesic  
147 hillsides (Immel and Anderson 2001). Pawpaw can reproduce both sexually and asexually,  
148 forming dense, discrete clonal patches (Hosaka et al. 2005). While not the most abundant species  
149 in temperate forests at larger spatial scales due to its patchy distribution, at our study site it is  
150 frequently the most abundant species at the 10x10 m scale when it is present (Appendix S1: Fig.  
151 S1), making it a *locally* dominant species. The local dominance and discrete patch structure of  
152 this species make it an ideal study system for investigating how the presence or absence of a  
153 dominant species affects community assembly processes.

#### 154 *Sampling design*

155 We selected five blocks to contain a pawpaw patch and an adjacent area without  
156 pawpaws, referred to as “inside” and “outside” patches, respectively (Fig. 1, Fig. 2). The inside  
157 (pawpaw) patches selected ranged from 58-435 m<sup>2</sup> in size (mean = 189 m<sup>2</sup>). The paired outside



158 patches were selected to have abiotic (soil and topographic) conditions similar to those inside the  
159 pawpaw patch and were 10 to 20 m from the edge of the pawpaw patch (Fig. 2a, 2c). We  
160 determined the similarity of soil and topographic conditions between the inside and outside  
161 patches through a Principal Component Analysis (PCA) on 17 soil and topographic variables  
162 (Appendix S1: Fig. S2). The values were estimated for each 10 × 10-m subplot in the 20-ha  
163 ForestGEO plot based on measurements taken in 2013 (detailed in Spasojevic et al. 2014,  
164 LaManna et al. 2016). The outside patches were chosen to have a similar PC1 score as the  
165 pawpaw patches.

166 For each patch type in each of the five blocks, five 1x1-m plots were sampled for plant  
167 community composition (n=25 inside plots, n=25 outside plots, n=50 plots total; Fig. 2b). Each  
168 plot was at least two m within the edge of the pawpaw patch but did not contain any woody  
169 stems over 1 cm DBH. Woody stems over 1 cm DBH were excluded to keep standard the  
170 amount of available ground area available for understory plants. We recorded the identity and  
171 estimated the abundance of all understory vascular plant species, i.e. herbaceous plants including  
172 ferns, and woody plants and vines. We estimated abundance (number of stems per species) as the  
173 number of 10x10-cm cells that contained rooted stems of the given species. In cases when  
174 individuals could not be identified to species in the field, they were identified to genus or  
175 assigned a morphospecies and photos were uploaded to iNaturalist for future assistance with  
176 identification; 8% of stems were considered morphospecies for analyses. We estimated local  
177 community size by summing the abundances of all species in each plot. Sampling was conducted  
178 during the peak growing season from July to September of 2021. Due to the different life stages  
179 and biology of young woody seedlings compared to the adult herbaceous plants, we conducted

180 two separate analyses for: 1) herbaceous and woody plant species combined (hereafter total  
181 understory community); and 2) herbaceous species only.

182

### 183 *Analyses*

184 We analyzed local species diversity, community size, and beta-diversity using linear  
185 mixed-effects models in R (package ‘nlme’; Pinheiro et al. 2023). All models included patch  
186 type (inside or outside) as a fixed effect and block as a random effect. When necessary, we log-  
187 transformed response variables to meet the assumptions of homogeneous variances between  
188 patch types and normality of model residuals. When transformation did not improve  
189 homogeneity of variances, we used a heterogeneous variance model (‘varIdent’ function). We  
190 describe the analyses for each response variable below.

191 To test our first prediction, we calculated local species diversity using the inverse  
192 Simpson’s index (Simpson 1949, Oksanen et al. 2022); a scale-independent diversity measure of  
193 the effective number of species that is insensitive to differences in numbers of individuals (Chase  
194 et al. 2018). For the model testing local diversity of the total understory community, we log-  
195 transformed the inverse-Simpson’s values to meet the assumption of homogeneous variances.  
196 For the model testing local diversity of herbaceous species only, we used a heterogeneous  
197 variance model and excluded the two plots with no species.

198 To test our second prediction, we calculated observed beta-diversity as the compositional  
199 dissimilarity among plots using the Bray-Curtis index. We analyzed beta-diversity based on  
200 distance-to-centroid values (Anderson 2006, Kraft et al. 2011) using the ‘betadisper’ function in  
201 the R vegan package (Oksanen et al. 2022), where each value represents the distance  
202 (compositional dissimilarity) from an individual plot to the centroid of the group of all 25 plots

203 within each patch type (Fig. 2b). When analyzing beta-diversity of herbaceous species only, we  
204 excluded two inside plots from block 5 that contained no herbaceous plants.

205 To test our third prediction, we used a null model to simulate the compositional  
206 dissimilarity expected by random community assembly (Kraft et al. 2011, Myers et al. 2013,  
207 LaManna et al. 2021). First, we defined the species pool as all species recorded during the study  
208 across all inside and outside plots combined. We estimated the total abundance of each species  
209 (number of stems) in the species pool by summing its frequencies (number of 10x10-cm cells in  
210 which a rooted stem was recorded) across all plots. Second, in each of 2000 iterations of the null  
211 model, we simulated community assembly in each plot by randomly sampling stems from the  
212 species pool, while keeping constant the empirically observed total number of stems in each plot  
213 (local community size) and total abundance of each species in the species pool. Third, we  
214 calculated the mean simulated beta-diversity for each plot by averaging the Bray-Curtis distance-  
215 to-centroid values from the 2000 null-model iterations. Fourth, we calculated the standardized  
216 effect size as the difference between the observed beta-diversity (distance-to-centroid) and mean  
217 simulated values for each plot, divided by the standard deviation of simulated values for each  
218 plot. A standardized effect size of zero indicates that observed beta-diversity does not differ from  
219 random sampling of the species pool, a positive value indicates higher beta-diversity than  
220 expected by chance, and a negative value indicates lower beta-diversity than expected by chance.  
221 We tested median standardized effect sizes of each patch type against the null expectation of  
222 zero with one-sample two-sided Wilcoxon tests. All analyses were conducted in R (R Core Team  
223 2022).

## 224 **Results**

225 Overall, we observed a total of 79 plant species and morphospecies (hereafter species) in this  
226 study, including 52 herbaceous plant species and 27 woody plant species (Appendix S1: Table  
227 S1, S2, S3). Only 6 species were unique to inside patches while there were 29 species unique to  
228 outside patches. Of the 52 herbaceous plant species, 24 occurred inside pawpaw patches and 47  
229 occurred in outside patches. Of the 27 woody plant species, 12 occurred inside pawpaw patches  
230 and 26 occurred in outside patches. Of the species that occurred in both patch types (inside and  
231 outside), most had lower abundance inside pawpaw patches (Appendix S1: Fig. S3). Among taxa  
232 identified to the species level (non-morphospecies, Appendix S1: Table S1, S2), herbaceous  
233 species were more abundant than woody species outside of pawpaw patches (68.4% of the total  
234 estimated number of stems), but less abundant than woody species inside pawpaw patches  
235 (39.9% of the total estimated number of stems).

### 236 **Local species diversity and community size**

237 Local species diversity and community size were significantly lower inside than outside  
238 pawpaw patches (Fig. 3, Appendix S1: Table S4). For herbaceous species only, median local  
239 diversity was 49% lower inside than outside pawpaw patches (Fig. 3a). Median community size  
240 (total estimated number of rooted stems of all species in a plot) for herbaceous species was 76%  
241 lower inside than outside pawpaw patches (Fig. 3b). Similar patterns were observed for the total  
242 understory community (herbaceous and woody species combined). For the total understory  
243 community, median local diversity was 29% lower inside than outside pawpaw patches (Fig. 3a),  
244 and median community size was 67% lower inside than outside pawpaw patches (Fig. 3b).

### 245 **Observed, simulated, and standardized effect sizes of beta-diversity**

246 Observed, simulated, and standardized effect sizes of beta-diversity differed significantly  
247 inside and outside pawpaw patches for herbaceous species only (Fig. 4a-c; Appendix S1: Table  
248 S4). Observed and simulated beta-diversity was higher inside than outside pawpaw patches (Fig.  
249 4a-b). In contrast, standardized effect sizes of beta-diversity were significantly lower inside than  
250 outside pawpaw patches (Fig. 4c). Median standardized effect sizes inside and outside of  
251 pawpaw patches were both positive and differed significantly from zero, though the difference  
252 was less significant inside pawpaw patches (Fig. 4c; Appendix S1: Table S5;  $P = 0.044$  inside  
253 patches;  $P = 0.001$  outside patches). Similar patterns were observed for the total understory  
254 community, with the exception of observed beta-diversity, which showed no significant  
255 difference between patch types. Median standardized effect sizes differed more between patch  
256 types, due to larger standardized effect sizes outside of pawpaw patches for the total understory  
257 community (Fig. 4f) compared to herbaceous species only (Fig. 4c). For the total understory  
258 community (Fig. 4f), median standardized effect sizes inside and outside pawpaw patches both  
259 differed significantly from zero (Table S4;  $P = 0.013$  inside patches;  $P < 0.001$  outside patches).

260

## 261 **Discussion**

262 Overall, our results support the stochastic assembly hypothesis. The lower local species  
263 diversity, lower community size, and more random variation in species composition found within  
264 pawpaw patches all support predictions of the stochastic assembly hypothesis. Beta-diversity was  
265 higher than expected by chance both inside and outside of pawpaw patches, but patterns of beta-  
266 diversity inside pawpaw patches more closely resembled the null expectation of random  
267 community assembly. These findings suggest that both deterministic and stochastic assembly  
268 processes are important in shaping the understory plant community, but that local communities

269 in different patch types are not assembled the same way, with stochastic processes being  
270 relatively more important than deterministic processes in patches dominated by pawpaw.

271 Observed beta-diversity of herbaceous species was higher inside than outside of pawpaw  
272 patches, supporting the second prediction of the stochastic assembly hypothesis (Fig. 4a). Higher  
273 beta-diversity among plots inside pawpaw patches is in line with the findings of other studies  
274 that observed the presence of dominant woody species increases beta-diversity (Ellison et al.  
275 2015, Ellison et al. 2019, ) or decreases local relative to regional diversity (Powell et al. 2013).  
276 However, previous studies have often focused on how dominant tree species affect other tree  
277 species, without explicit consideration of their effects on herbaceous species. In our study, the  
278 difference in observed beta-diversity of herbaceous species inside and outside of pawpaw  
279 patches (Fig. 4a) became weaker and non-significant when considering the total understory  
280 community of herbaceous and woody species together (Fig. 4d). This indicates that abundances  
281 of woody species are consistent enough across the patch types to reduce overall differences in  
282 community composition. This could be due to several factors. First, woody species are generally  
283 less dispersal-limited than herbaceous species (Turnbull et al. 2000). In our study, for example,  
284 the most-common species of woody seedlings present inside pawpaw patches was northern  
285 spicebush (*Lindera benzoin*) (Appendix S1: Table S1), a bird-dispersed shrub with high adult  
286 abundance at our site. With increased dispersal, we expect decreased beta-diversity (Leibold and  
287 Chase 2017, Germain et al. 2017, Ron et al. 2018, Thompson et al. 2020). Second, the woody  
288 seedlings are at a life stage that experiences higher mortality and is generally less diverse than  
289 the adult tree community (Green et al. 2014, Ramachandran et al. 2023). Seedling communities  
290 have been shown to have lower beta-diversity than adult tree communities (Ramachandran et al.  
291 2023), presumably due to these ontogenetic differences in the importance of different assembly

292 mechanisms (Cavender-Bares and Bazzaz 2000, Comita et al. 2007, Green et al. 2014,  
293 Spasojevic et al. 2014). Meanwhile, the herbaceous community largely contains diverse adult  
294 assemblages that survived past the seedling stage. Lastly, most of the plant species diversity in  
295 temperate forests is comprised of herbaceous species, many of which are rare in the understory  
296 (Gilliam 2007, Spicer et al. 2020), such that including more common woody species will  
297 inherently shift the composition towards being more similar. These results illustrate the need to  
298 further investigate how herbaceous communities assemble in forests, as differences in functional  
299 diversity and life-stages between herbaceous and woody species can elucidate different assembly  
300 processes in the understory (Spicer et al. 2022).

301       Patterns of beta-diversity inside pawpaw patches more closely resembled the null  
302 expectation of random assembly (Fig. 4c, f), supporting the third prediction of the stochastic  
303 assembly hypothesis. . The smaller effect sizes inside pawpaw patches could reflect several  
304 ecological processes. First, theory (Hubbell 2001, Orrock and Watling 2010, Vellend 2016) and  
305 empirical studies (e.g. Gilbert and Levine 2017, Siqueira et al. 2020, Fodelianakis et al. 2021)  
306 show that decreases in community size causes random changes in species relative abundances  
307 (ecological drift), thereby increasing compositional variation among local communities. In our  
308 study, community size was 49–76% lower inside than outside pawpaw patches (Fig. 3b), and of  
309 the species present in both patch types, most had much lower abundance inside pawpaw patches  
310 (Appendix S1: Fig. S3), likely making local populations within pawpaw patches more prone to  
311 demographic stochasticity. Second, simulation models exploring the interplay between selection  
312 and ecological drift show that high beta-diversity can emerge when niche-based processes  
313 exacerbate the effects of neutral processes (Latombe et al. 2015). For example, Gilbert and  
314 Levine (2017) demonstrated that the presence of a dominant competitor can deterministically

315 lower other species' relative abundances to a point where stochasticity has an even greater effect,  
316 causing very high species turnover among their plots with the smallest overall community sizes.  
317 Third, larger null-model deviations outside of pawpaw patches can reflect more deterministic  
318 processes such as fine-scale environmental heterogeneity, local plant-soil and plant-plant  
319 interactions, and species-specific differences in dispersal ability (Condit et al. 2002, Bauer et al.  
320 2017, Germain et al. 2017, Thompson et al. 2020). These deterministic processes likely  
321 contribute to the non-random patterns of beta-diversity observed inside and outside pawpaw  
322 patches, as well as the relatively stronger non-random patterns observed outside pawpaw  
323 patches.

324 We also found that local species diversity was consistently lower inside than outside  
325 pawpaw patches (Fig. 3a). Previous studies have found that dominant plant species can decrease  
326 local diversity (e.g. Myers and Harms 2009, McCain et al. 2010, Ellison et al. 2015, Hejda et al.  
327 2019, Hernández et al. 2022, Eckberg et al. 2023), but the underlying ecological processes  
328 remain unresolved. Although our study cannot discern the degree to which low species diversity  
329 inside patches reflects dispersal limitation, non-random competitive exclusion, or ecological  
330 drift, lower community size may increase the role of ecological drift inside pawpaw patches. The  
331 effects of community size and dispersal limitation may be further exacerbated in larger pawpaw  
332 patches, where dispersal from source populations located outside patches may be less likely to  
333 balance local extinctions of dispersal-limited herbs inside pawpaw patches. Additionally, our  
334 findings are in contrast to studies that found that some dominant species facilitated species  
335 diversity by mitigating harsh conditions, often at the edge of subordinate species' range (Dayton  
336 1972, Pellissier et al. 2010, Gavilán and Callaway 2017, Elsberry and Bracken 2021).



337           Several abiotic and biotic factors may explain the lower community size, lower local  
338 species diversity, and more random patterns of beta-diversity within pawpaw patches. First,  
339 above and below ground abiotic conditions may be altered by pawpaw trees. Pawpaws have been  
340 shown to be strong competitors for light which could decrease the abundances of otherwise  
341 shade-tolerant understory plants (Cole and Weltzin 2005). In addition, high pawpaw stem  
342 densities and clonal growth may increase belowground competition for soil nutrients and water  
343 (Baumer and Runkle 2010). Second, pawpaw may be allelopathic (McEwan et al. 2010,  
344 Pavliuchenko 2018). In our study ecosystem, sites invaded by the allelopathic shrub, bush  
345 honeysuckle (*Lonicera mackii*), have low diversity of native plant species (Powell et al. 2013),  
346 making this a particularly intriguing hypothesis. However, the current evidence for allelopathy in  
347 pawpaws is weak (McEwan et al. 2010, Pavliuchenko 2018) to negative (Cole and Weltzin  
348 2005). Third, pawpaw's interaction with a dominant herbivore, white-tailed deer (*Odocoileus*  
349 *virginianus*), may explain patterns of diversity. Pawpaw is unpalatable to deer, leading deer to  
350 selectively browse other species (Slater and Anderson 2014, Shelton et al. 2014, Jenkins et al.  
351 2015). If deer are selectively browsing the herbaceous layer in pawpaw communities to avoid the  
352 unpalatable pawpaw leaves, this could decrease community size, decrease local species diversity,  
353 and increase beta-diversity within pawpaw patches. Alternatively, if deer avoid pawpaw patches  
354 altogether due to their inedibility, this could potentially decrease seed dispersal by deer via  
355 endozoochory and epizoochory of new propagules into pawpaw patches (e.g. Myers et al. 2004,  
356 Blyth et al. 2013, Guiden 2017). Finally, a combination of suboptimal niche conditions and  
357 medium to high dispersal rates may make local communities within pawpaw patches subject to  
358 source-sink dynamics, with pawpaw patches harboring "sink" populations (Pulliam 1988).

359           Our study highlights several avenues for future research on the mechanisms by which  
360 pawpaw shapes forest community assembly. Future studies can use seed-addition experiments to  
361 test the degree to which low species diversity (Myers and Harms 2009) and high beta-diversity  
362 (Germain et al. 2017) of herbaceous species are caused by dispersal limitation within pawpaw  
363 patches. Similarly, investigating the degree to which micro-habitat variation in light and soil  
364 conditions inside and outside pawpaw patches determine community composition can help  
365 further differentiate between deterministic and stochastic assembly processes. Future studies can  
366 also explore how pawpaw patch characteristics such as patch size, age, and demography affect  
367 the strength of these processes and biodiversity patterns. Long-term studies of woody plant  
368 recruitment, growth, and survival inside and outside of pawpaw patches can elucidate how  
369 pawpaws may affect forest regeneration (Baumer and Runkle 2010, Hochwender et al. 2016) or  
370 invasive species spread (Cole and Weltzin 2005). Further understanding the biology and ecology  
371 of this and other locally-dominant tree species will provide key insights into how species  
372 interactions drive the assembly, diversity, and dynamics of understory plant communities at  
373 varying spatial scales.

374

### 375 **Acknowledgements**

376 We thank Erin O'Connell, Nathan Aaron, Aspen Workman, James Lucas, Noah Dell, and Brad  
377 Delfeld for species identification support, Sean W. McHugh for coding assistance and coffee,  
378 Christopher Catano for sharing his species list and mapping code, members of the Myers Lab,  
379 Landis Lab and Sebastian Tello for discussions and comments on the manuscript, the Tyson  
380 Research Center staff, and the more than 140 research technicians, undergraduate students, and  
381 high school students that have contributed to the Tyson Research Center Forest Global Earth

382 Observatory (ForestGEO) Plot Project. This project was supported by a Webster Groves Nature  
383 Study Society (WGNSS) Bo Koster Scholarship to ACW, George Hayward Plant Biology  
384 Graduate Fellowship to ACW, Maxwell/Hanrahan Foundation Field Work Grant from the  
385 Missouri Botanical Garden to ACW, National Science Foundation grants DEB 1557094 and  
386 DEB 2240431 to JAM, the International Center for Advanced Renewable Energy and  
387 Sustainability (I-CARES) at Washington University in St. Louis, ForestGEO, Washington  
388 University in St. Louis' Provost's Office, and Tyson Research Center.

389

390 **Conflict of Interest:**

391 The authors report no conflict of interest.

## 392 **References**

- 393 Altieri, A. H., and J. D. Witman. 2014. Modular mobile foundation species as reservoirs of  
394 biodiversity. *Ecosphere* .
- 395 Anderson, M. J. 2006. Distance-based tests for homogeneity of multivariate dispersions. *Biometrics*  
396 62:245–253.
- 397 Anderson, M. J., T. O. Crist, J. M. Chase, M. Vellend, B. D. Inouye, A. L. Freestone, N. J. Sanders,  
398 H. V. Cornell, L. S. Comita, K. F. Davies, S. P. Harrison, N. J. B. Kraft, J. C. Stegen, and  
399 N. G. Swenson. 2011. Navigating the multiple meanings of  $\beta$  diversity: a roadmap for the  
400 practicing ecologist. *Ecology letters* 14:19–28.
- 401 Anderson-Teixeira, K. J., S. J. Davies, A. C. Bennett, E. B. Gonzalez-Akre, H. C. Muller-Landau, S.  
402 J. Wright, K. Abu Salim, A. M. Almeyda Zambrano, A. Alonso, J. L. Baltzer, Y. Basset,  
403 N. A. Bourg, E. N. Broadbent, W. Y. Brockelman, S. Bunyavejchewin, D. F. R. P.  
404 Burslem, N. Butt, M. Cao, D. Cardenas, G. B. Chuyong, K. Clay, S. Cordell, H. S.  
405 Dattaraja, X. Deng, M. Detto, X. Du, A. Duque, D. L. Erikson, C. E. N. Ewango, G. A.  
406 Fischer, C. Fletcher, R. B. Foster, C. P. Giardina, G. S. Gilbert, N. Gunatilleke, S.  
407 Gunatilleke, Z. Hao, W. W. Hargrove, T. B. Hart, B. C. H. Hau, F. He, F. M. Hoffman,  
408 R. W. Howe, S. P. Hubbell, F. M. Inman-Narahari, P. A. Jansen, M. Jiang, D. J. Johnson,  
409 M. Kanzaki, A. R. Kassim, D. Kenfack, S. Kibet, M. F. Kinnaird, L. Korte, K. Kral, J.  
410 Kumar, A. J. Larson, Y. Li, X. Li, S. Liu, S. K. Y. Lum, J. A. Lutz, K. Ma, D. M.  
411 Maddalena, J.-R. Makana, Y. Malhi, T. Marthews, R. Mat Serudin, S. M. McMahon, W.  
412 J. McShea, H. R. Memiaghe, X. Mi, T. Mizuno, M. Morecroft, J. A. Myers, V. Novotny,  
413 A. A. de Oliveira, P. S. Ong, D. A. Orwig, R. Ostertag, J. den Ouden, G. G. Parker, R. P.  
414 Phillips, L. Sack, M. N. Sainge, W. Sang, K. Sri-Ngernyuang, R. Sukumar, I.-F. Sun, W.  
415 Sungpalee, H. S. Suresh, S. Tan, S. C. Thomas, D. W. Thomas, J. Thompson, B. L.  
416 Turner, M. Uriarte, R. Valencia, M. I. Vallejo, A. Vicentini, T. Vrška, X. Wang, X.

- 417 Wang, G. Weiblen, A. Wolf, H. Xu, S. Yap, and J. Zimmerman. 2015. CTFS-  
418 ForestGEO: a worldwide network monitoring forests in an era of global change. *Global*  
419 *change biology* 21:528–549.
- 420 Arnillas, C. A., and M. W. Cadotte. 2019. Experimental dominant plant removal results in  
421 contrasting assembly for dominant and non-dominant plants. *Ecology letters* 22:1233–  
422 1242.
- 423 Avolio, M. L., E. J. Forrestel, C. C. Chang, K. J. La Pierre, K. T. Burghardt, and M. D. Smith. 2019.  
424 Demystifying dominant species. *The New phytologist* 223:1106–1126.
- 425 Bauer, J. T., N. Blumenthal, A. J. Miller, J. K. Ferguson, and H. L. Reynolds. 2017. Effects of  
426 between-site variation in soil microbial communities and plant-soil feedbacks on the  
427 productivity and composition of plant communities. *The Journal of applied ecology*  
428 54:1028–1039.
- 429 Baumer, M., and J. R. Runkle. 2010. Tree Seedling Establishment Under the Native Shrub, *Asimina*  
430 *triloba*. *Castanea* 75:421–432.
- 431 Blyth, L. H., L. J. Ouborg, D. M. Johnson, and L. J. Anderson. 2013. The short-term germination  
432 and establishment success of deer-dispersed seeds in mesic temperate forests. *The Journal*  
433 *of the Torrey Botanical Society* 140:334–348.
- 434 Catano, C. P., T. L. Dickson, and J. A. Myers. 2017. Dispersal and neutral sampling mediate  
435 contingent effects of disturbance on plant beta-diversity: a meta-analysis. *Ecology letters*  
436 20:347–356.
- 437 Cavender-Bares, J., and F. A. Bazzaz. 2000. Changes in drought response strategies with ontogeny  
438 in *Quercus rubra*: implications for scaling from seedlings to mature trees. *Oecologia*  
439 124:8–18.
- 440 Chase, J. M. 2007. Drought mediates the importance of stochastic community assembly.  
441 *Proceedings of the National Academy of Sciences of the United States of America*  
442 104:17430–17434.

- 443 Chase, J. M., B. J. McGill, D. J. McGlenn, F. May, S. A. Blowes, X. Xiao, T. M. Knight, O.  
444 Purschke, and N. J. Gotelli. 2018. Embracing scale-dependence to achieve a deeper  
445 understanding of biodiversity and its change across communities. *Ecology letters*  
446 21:1737–1751.
- 447 Chase, J. M., and J. A. Myers. 2011. Disentangling the importance of ecological niches from  
448 stochastic processes across scales. *Philosophical transactions of the Royal Society of*  
449 *London. Series B, Biological sciences* 366:2351–2363.
- 450 Cole, P. G., and J. F. Weltzin. 2005. Light limitation creates patchy distribution of an invasive grass  
451 in eastern deciduous forests. *Biological invasions* 7:477–488.
- 452 Comita, L. S., R. Condit, and S. P. Hubbell. 2007. Developmental changes in habitat associations of  
453 tropical trees. *The Journal of ecology* 95:482–492.
- 454 Condit, R., P. S. Ashton, P. Baker, S. Bunyavejchewin, S. Gunatilleke, N. Gunatilleke, S. P.  
455 Hubbell, R. B. Foster, A. Itoh, J. V. LaFrankie, H. S. Lee, E. Losos, N. Manokaran, R.  
456 Sukumar, and T. Yamakura. 2000, May 26. Spatial patterns in the distribution of tropical  
457 tree species. [science.org](http://science.org).
- 458 Condit, R., N. Pitman, E. G. Leigh Jr, J. Chave, J. Terborgh, R. B. Foster, P. Núñez, S. Aguilar, R.  
459 Valencia, G. Villa, H. C. Muller-Landau, E. Losos, and S. P. Hubbell. 2002. Beta-  
460 diversity in tropical forest trees. *Science* 295:666–669.
- 461 Dayton, P. K. 1972. Toward an understanding of community resilience and the potential effects of  
462 enrichments of the benthos at McMurdo Sound, Antarctica. Pages 81–96 *in* B. C. Parker,  
463 editor. *Proceedings of the Colloquium on Conservation Problems in Antarctica*. Allen  
464 Press, Lawrence, Kansas, USA.
- 465 Eckberg, J. N., A. Hubbard, E. T. Schwarz, E. T. Smith, and N. J. Sanders. 2023. The dominant plant  
466 species *Solidago canadensis* structures multiple trophic levels in an old field ecosystem.  
467 *Ecosphere* 14.
- 468 Ellison, A. M. 2019. Foundation Species, Non-trophic Interactions, and the Value of Being

- 469 Common. *iScience* 13:254–268.
- 470 Ellison, A. M., M. S. Bank, B. D. Clinton, E. A. Colburn, K. Elliott, C. R. Ford, D. R. Foster, B. D.  
471 Kloeppel, J. D. Knoepp, G. M. Lovett, J. Mohan, D. A. Orwig, N. L. Rodenhouse, W. V.  
472 Sobczak, K. A. Stinson, J. K. Stone, C. M. Swan, J. Thompson, B. Von Holle, and J. R.  
473 Webster. 2005. Loss of foundation species: consequences for the structure and dynamics  
474 of forested ecosystems. *Frontiers in Ecology* 3:479–486.
- 475 Ellison, A. M., A. A. Barker Plotkin, and S. Khalid. 2015. Foundation Species Loss and Biodiversity  
476 of the Herbaceous Layer in New England Forests. *Forests, Trees and Livelihoods* 7:9.
- 477 Ellison, A. M., H. L. Buckley, B. S. Case, D. Cardenas, Á. J. Duque, J. A. Lutz, J. A. Myers, D. A.  
478 Orwig, and J. K. Zimmerman. 2019. Species Diversity Associated with Foundation  
479 Species in Temperate and Tropical Forests. *Forests, Trees and Livelihoods* 10:128.
- 480 Elsberry, L. A., and M. E. S. Bracken. 2021. Functional redundancy buffers mobile invertebrates  
481 against the loss of foundation species on rocky shores. *Marine ecology progress series*  
482 673:43–54.
- 483 Fodelianakis, S., A. Valenzuela-Cuevas, A. Barozzi, and D. Daffonchio. 2021. Direct quantification  
484 of ecological drift at the population level in synthetic bacterial communities. *The ISME*  
485 *journal* 15:55–66.
- 486 Gaston, K. J. 2011. *Common Ecology*. *Bioscience* 61:354–362.
- 487 Gavilán, R. G., and R. M. Callaway. 2017. Effects of foundation species above and below tree line.  
488 *Plant Biosystems - An International Journal Dealing with all Aspects of Plant Biology*  
489 151:665–672.
- 490 Germain, R. M., S. Y. Strauss, and B. Gilbert. 2017. Experimental dispersal reveals characteristic  
491 scales of biodiversity in a natural landscape. *Proceedings of the National Academy of*  
492 *Sciences of the United States of America* 114:4447–4452.
- 493 Gilbert, B., and J. M. Levine. 2017. Ecological drift and the distribution of species diversity.  
494 *Proceedings. Biological sciences / The Royal Society* 284.

- 495 Gilbert, B., R. Turkington, and D. S. Srivastava. 2009. Dominant species and diversity: linking  
496 relative abundance to controls of species establishment. *The American naturalist*  
497 174:850–862.
- 498 Gilliam, F. S. 2007. The Ecological Significance of the Herbaceous Layer in Temperate Forest  
499 Ecosystems. *Bioscience* 57:845–858.
- 500 Green, P. T., K. E. Harms, and J. H. Connell. 2014. Nonrandom, diversifying processes are  
501 disproportionately strong in the smallest size classes of a tropical forest. *Proceedings of*  
502 *the National Academy of Sciences of the United States of America* 111:18649–18654.
- 503 Grime, J. P. 1998. Benefits of plant diversity to ecosystems: immediate, filter and founder effects.  
504 *The Journal of ecology* 86:902–910.
- 505 Guiden, P. W. 2017. Spatial heterogeneity in white-tailed deer activity increases seed dispersal of  
506 shade-intolerant plants near forest edges in fragmented forests. *The Journal of the Torrey*  
507 *Botanical Society* 144:371–378.
- 508 Hejda, M., K. Štajerová, J. Pergl, and P. Pyšek. 2019. Impacts of dominant plant species on trait  
509 composition of communities: comparison between the native and invaded ranges.  
510 *Ecosphere* 10.
- 511 Hernández, D. L., A. Antia, and M. J. McKone. 2022. The ecosystem impacts of dominant species  
512 exclusion in a prairie restoration. *Ecological applications: a publication of the Ecological*  
513 *Society of America* 32:e2592.
- 514 Hochwender, C. G., A. Nunn, M. Sonnenberger, and M. Roberts. 2016. Tree Regeneration in a  
515 Southwestern Indiana Forest: Implications of Long-Term Browsing by Deer. *Proceedings*  
516 *of the Indiana Academy of Science* 125:103–113.
- 517 Hosaka, N., S. Gómez, N. Kachi, J. F. Stuefer, and D. F. Whigham. 2005. The ecological  
518 significance of clonal growth in the understory tree, pawpaw (*Asimina triloba*).  
519 *Northeastern naturalist* 12:11–22.
- 520 Hubbell, S. P. 2001. *The unified neutral theory of biodiversity and biogeography* Princeton



- 521 University Press. Princeton, New Jersey.
- 522 Hughes, B. B. 2010. Variable effects of a kelp foundation species on rocky intertidal diversity and  
523 species interactions in central California. *Journal of experimental marine biology and*  
524 *ecology* 393:90–99.
- 525 Jenkins, L. H., B. D. Murray, and M. A. Jenkins. 2015. Woody regeneration response to over a  
526 decade of deer population reductions in Indiana state parks. *The Journal of the Torrey*  
527 *Botanical Society* 142:205–219.
- 528 J Pinheiro, D Bates, R Core Team. 2023. *nlme: Linear and Nonlinear Mixed Effects Models*.
- 529 Kathryn N. S. McCain, Sara G. Baer, John M. Blair, Gail W. T. Wilson. 2010. Dominant Grasses  
530 Suppress Local Diversity in Restored Tallgrass Prairie. *Restoration Ecology* 18.
- 531 Keddy, P. A., and B. Shipley. 1989. Competitive Hierarchies in Herbaceous Plant Communities.  
532 *Oikos* 54:234–241.
- 533 Konno, Y. 2002. Effects of competitive exclusion by the dominant *Sasa tsuboiana* on associate  
534 species. *Vegetation Science* 19:1–10.
- 535 Kraft, N. J. B., L. S. Comita, J. M. Chase, N. J. Sanders, N. G. Swenson, T. O. Crist, J. C. Stegen, M.  
536 Vellend, B. Boyle, M. J. Anderson, H. V. Cornell, K. F. Davies, A. L. Freestone, B. D.  
537 Inouye, S. P. Harrison, and J. A. Myers. 2011. Disentangling the drivers of  $\beta$  diversity  
538 along latitudinal and elevational gradients. *Science* 333:1755–1758.
- 539 LaManna JA, Burkle LA, Belote RT, Myers JA. Biotic and abiotic drivers of plant–pollinator  
540 community assembly across wildfire gradients. *Journal of Ecology* 2021; 109: 1000–  
541 1013. <https://doi.org/10.1111/1365-2745.13530>
- 542 LaManna, J. A., M. L. Walton, B. L. Turner, and J. A. Myers. 2016. Negative density dependence is  
543 stronger in resource-rich environments and diversifies communities when stronger for  
544 common but not rare species. *Ecology letters* 19:657–667.
- 545 Latombe, G., C. Hui, and M. A. McGeoch. 2015. Beyond the continuum: a multi-dimensional phase  
546 space for neutral-niche community assembly. *Proceedings. Biological sciences / The*

- 547 Royal Society 282:20152417.
- 548 Leibold, M. A., and J. M. Chase. 2017. *Metacommunity Ecology*, Volume 59. Princeton University  
549 Press.
- 550 Lustenhouwer, M. N., L. Nicoll, and A. M. Ellison. 2012. Microclimatic effects of the loss of a  
551 foundation species from New England forests. *Ecosphere* 3:art26.
- 552 MacArthur, R. H., and E. O. Wilson. 1967. *The Theory of Island Biogeography*. Princeton  
553 University Press.
- 554 McEwan, R. W., L. G. Arthur-Paratley, L. K. Rieske, and M. A. Arthur. 2010. A multi-assay  
555 comparison of seed germination inhibition by *Lonicera maackii* and co-occurring native  
556 shrubs. *Flora - Morphology, Distribution, Functional Ecology of Plants* 205:475–483.
- 557 Myers, J. A., J. M. Chase, I. Jiménez, P. M. Jørgensen, A. Araujo-Murakami, N. Paniagua-  
558 Zambrana, and R. Seidel. 2013. Beta-diversity in temperate and tropical forests reflects  
559 dissimilar mechanisms of community assembly. *Ecology letters* 16:151–157.
- 560 Myers, J. A., and K. E. Harms. 2009. Local immigration, competition from dominant guilds, and the  
561 ecological assembly of high-diversity pine savannas. *Ecology* 90:2745–2754.
- 562 Myers, J. A., M. Vellend, S. Gardescu, and P. L. Marks. 2004. Seed dispersal by white-tailed deer:  
563 implications for long-distance dispersal, invasion, and migration of plants in eastern  
564 North America. *Oecologia* 139:35–44.
- 565 Oksanen, J., G. L. Simpson, F. G. Blanchet, R. Kindt, P. Legendre, P. R. Minchin, R. B. O’Hara, P.  
566 Solymos, M. H. H. Stevens, E. Szoecs, H. Wagner, M. Barbour, M. Bedward, B. Bolker,  
567 D. Borcard, G. Carvalho, M. Chirico, M. De Caceres, S. Durand, H. B. A. Evangelista, R.  
568 FitzJohn, M. Friendly, B. Furneaux, G. Hannigan, M. O. Hill, L. Lahti, D. McGlinn, M.-  
569 H. Ouellette, E. Ribeiro Cunha, T. Smith, A. Stier, C. J. F. Ter Braak, and J. Weedon.  
570 2022. *vegan: Community Ecology Package*.
- 571 Orrock, J.L. and J. I. Waitling. 2010. Local community size mediates ecological drift and  
572 competition in metacommunities. *Proceedings of the Royal Society B* 277:2185-2191.

- 573 Pavliuchenko, N. A. 2018. Allelopathic and biochemical characteristics of the root environment of  
574 *Asimina triloba* (L.) dunal. Pages 62–68 *Agrobiodiversity for Improving Nutrition,*  
575 *Health and Life Quality.* Slovak University of Agriculture in Nitra, Slovakia.
- 576 Pellissier, L., K. Anne Bråthen, J. Pottier, C. F. Randin, P. Vittoz, A. Dubuis, N. G. Yoccoz, T. Alm,  
577 N. E. Zimmermann, and A. Guisan. 2010. Species distribution models reveal apparent  
578 competitive and facilitative effects of a dominant species on the distribution of tundra  
579 plants. *Ecography* 33:1004–1014.
- 580 Powell, K. I., J. M. Chase, and T. M. Knight. 2013. Invasive plants have scale-dependent effects on  
581 diversity by altering species-area relationships. *Science* 339:316–318.
- 582 Pulliam, H. R. 1988. Sources, Sinks, and Population Regulation. *The American naturalist* 132:652–  
583 661.
- 584 Ramachandran, A., J. D. Huxley, S. McFaul, L. Schauer, J. Diez, R. Boone, T. Madsen-Hepp, E.  
585 McCann, J. Franklin, D. Logan, M. B. Rose, and M. J. Spasojevic. 2023. Integrating  
586 ontogeny and ontogenetic dependency into community assembly. *The Journal of ecology*  
587 111:1561–1574.
- 588 R Core Team. 2022. R: A Language and Environment for Statistical Computing. R Foundation for  
589 Statistical Computing, Vienna, Austria.
- 590 Ron, R., O. Fragman-Sapir, and R. Kadmon. 2018. Dispersal increases ecological selection by  
591 increasing effective community size. *Proceedings of the National Academy of Sciences*  
592 *of the United States of America* 115:11280–11285.
- 593 Segre, H., R. Ron, N. De Malach, Z. Henkin, M. Mandel, and R. Kadmon. 2014. Competitive  
594 exclusion, beta diversity, and deterministic vs. stochastic drivers of community assembly.  
595 *Ecology letters* 17:1400–1408.
- 596 Shelton, A. L., J. A. Henning, P. Schultz, and K. Clay. 2014. Effects of abundant white-tailed deer  
597 on vegetation, animals, mycorrhizal fungi, and soils. *Forest ecology and management*  
598 320:39–49.

- 599 Simpson, E. H. 1949. Measurement of Diversity. *Nature* 163:688–688.
- 600 Siqueira, T., V. S. Saito, L. M. Bini, A. S. Melo, D. K. Petsch, V. L. Landeiro, K. T. Tolonen, J.  
601 Jyrkänkallio-Mikkola, J. Soininen, and J. Heino. 2020. Community size can affect the  
602 signals of ecological drift and niche selection on biodiversity. *Ecology* 101:e03014.
- 603 Slater, M. A., and R. C. Anderson. 2014. Intensive Selective Deer Browsing Favors Success of  
604 *Asimina triloba* (Paw Paw) a Native Tree Species. *Natural Areas Journal* 34:178–187.
- 605 Spasojevic, M. J., E. A. Yablon, B. Oberle, and J. A. Myers. 2014. Ontogenetic trait variation  
606 influences tree community assembly across environmental gradients. *Ecosphere* .
- 607 Spicer, M. E., H. Mellor, and W. P. Carson. 2020. Seeing beyond the trees: a comparison of tropical  
608 and temperate plant growth forms and their vertical distribution. *Ecology* 101:e02974.
- 609 Sullivan, J. 1993. *Asimina triloba*. USDA Forest Service, Rocky Mountain Research Station, Fire  
610 Sciences Laboratory.
- 611 Thompson, P. L., L. M. Guzman, L. De Meester, Z. Horváth, R. Ptacnik, B. Vanschoenwinkel, D. S.  
612 Viana, and J. M. Chase. 2020. A process-based metacommunity framework linking local  
613 and regional scale community ecology. *Ecology letters* 23:1314–1329.
- 614 Turnbull, L. A., M. J. Crawley, and M. Rees. 2000. Are plant populations seed-limited? A review  
615 of seed sowing experiments. *Oikos* 88:225–238.
- 616 Vellend, M. 2010. Conceptual synthesis in community ecology. *The Quarterly review of biology*  
617 85:183–206.
- 618 Vellend, M. 2016. *The Theory of Ecological Communities (MPB-57)*. Princeton University Press.
- 619 Zimmerman, M., and W. L. Wagner. 1979. A Description of the Woody Vegetation of Oak-Hickory  
620 Forest in the Northern Ozark Highlands. *Bulletin of the Torrey Botanical Club* 106:117–  
621 122.

622

623

624 **Figure Captions**

625 Fig. 1. Examples of understory plant communities (a) inside a pawpaw (*Asimina triloba*) patch  
626 (“inside plot”) and (b) outside a pawpaw patch at least 10 m away from the patch edge (“outside  
627 plot”). White squares show 1x1-m plots. Photos by Anna C. Wassel.

628

629 Fig. 2. Sampling design within the Tyson Research Center ForestGEO Plot, Missouri. (a)  
630 Abiotic conditions (soil resources & topography) represented by the first axis of a principal  
631 component analysis (PCA) including 17 environmental variables at the 10x10-m scale  
632 (Appendix S1: Fig. S2), mapped locations of all pawpaw stems  $\geq 1$  cm in diameter at breast  
633 height (DBH), and selected sampling blocks. Blue values represent areas of lower elevation,  
634 higher soil-nutrient availability, and higher soil pH, whereas red values represent higher  
635 elevation, lower nutrient availability, and more acidic soils. (b) For each block, the pawpaw  
636 patch edge was defined and five 1x1-m plots were placed inside or outside the patch. Gray  
637 arrows represent how beta-diversity was calculated within each of the two patch types (inside  
638 and outside plots). (c) Each block is shown zoomed in to illustrate the environmental conditions  
639 and relative location for both the inside patches (yellow stars over pawpaw stems) and outside  
640 patches represented by gray rectangles.

641

642 Fig. 3. Local plant species diversity and community size are lower inside than outside of pawpaw  
643 patches. (a) Local species diversity (inverse Simpson’s index) outside ( $N = 25$ ) and inside plots  
644 ( $N = 25$ ) for the total understory community (herbaceous and woody plant species), and  
645 herbaceous species only. (b) Local community size for the total understory community, and  
646 herbaceous species only. Community size was estimated as the total number of rooted stems of

647 all species in each plot. Boxes represent the median and 25th/75th percentile, whiskers extend to  
648 the largest value up to 1.5 times the interquartile range, and dots represent outlier data points.

649 (\*\*\*) =  $P < 0.001$ )

650

651 Fig. 4. Variation in species composition (beta-diversity) differs inside and outside of pawpaw  
652 patches. (a) Observed beta-diversity of herbaceous plant species in plots outside ( $N = 25$ ) and  
653 inside ( $N = 23$ ) pawpaw patches. (b) Simulated beta-diversity expected from a null model of  
654 random assembly. (c) Standardized effect size of beta-diversity. Panels (d), (e), and (f) show the  
655 same results including herbaceous and woody species. The dashed line at zero represents the null  
656 expectation. Boxes represent the median and 25th/75th percentile, whiskers extend to the largest  
657 value up to 1.5 times the interquartile range, and dots represent outlier data points. (n.s. = not  
658 significant, \* =  $P < 0.05$ , \*\* =  $P < 0.01$ , \*\*\* =  $P < 0.001$ )

659 **Figures**

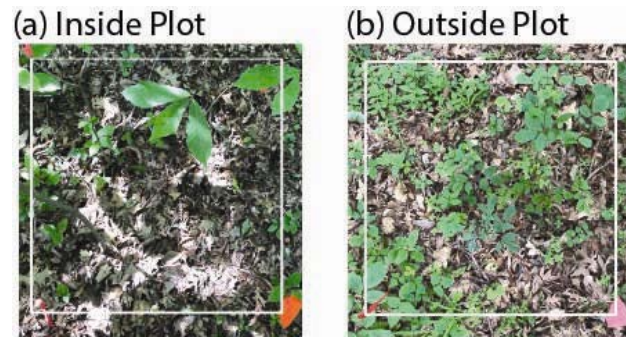

660

661

662 **Figure 1.**

663

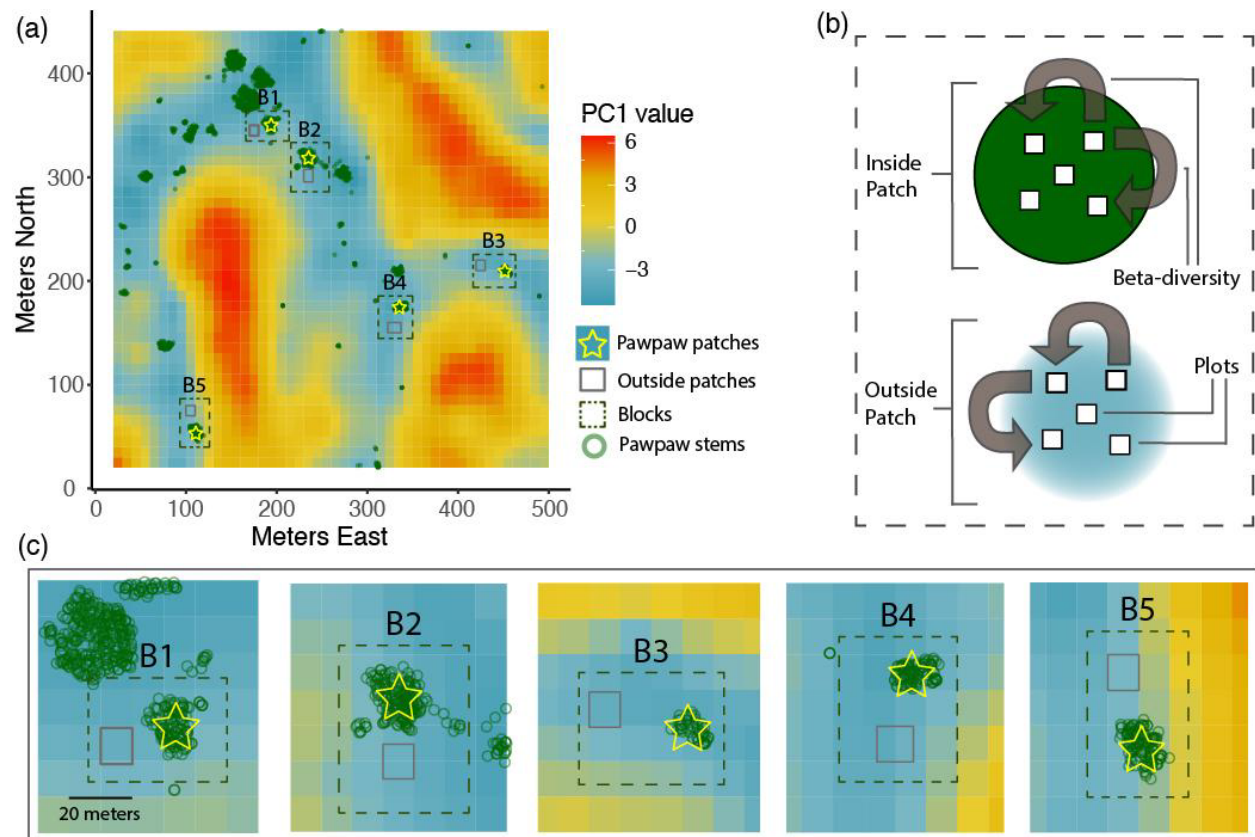

664  
665  
666

**Figure 2.**



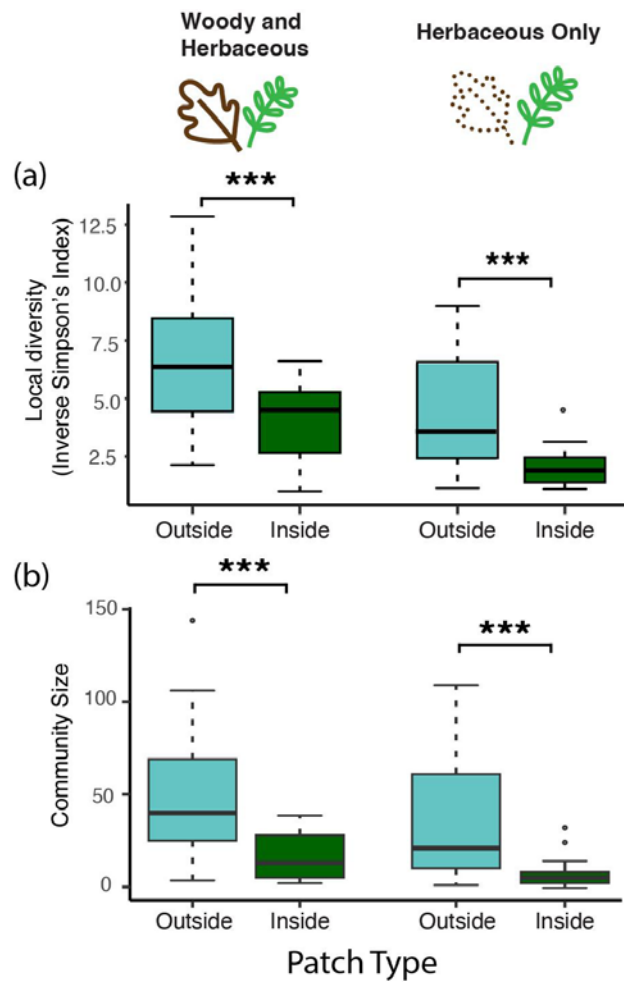

667  
668 **Figure 3**

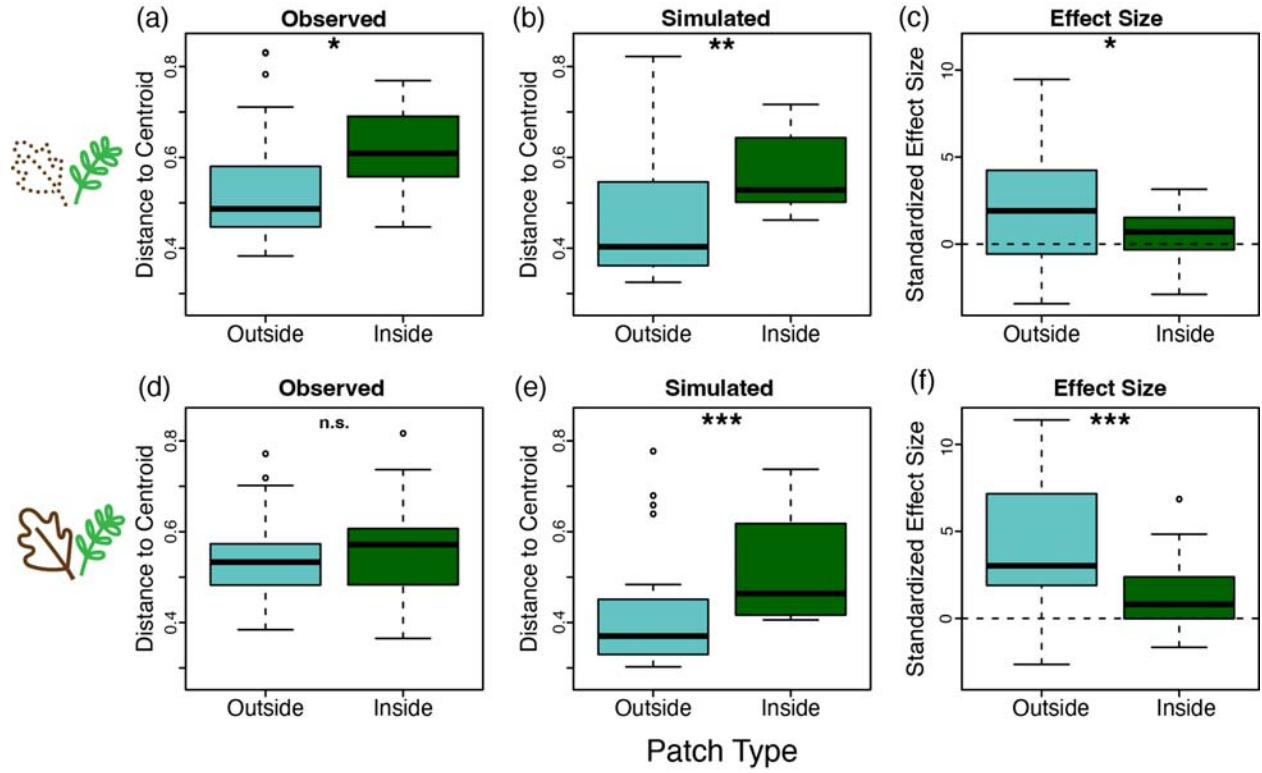

669  
670 **Figure 4**
